# Supplementary material for: Natural Products as Protective Agents for Male Fertility
Source: MDPI journal article supplement (doi:10.3390/biochem1030011), 2021-09-28
Supplement: s1 [file s1]

| Supplementary Table: |            |                                                                                                                                                                                                                                                                                                                                                                       |            |
|----------------------|------------|-----------------------------------------------------------------------------------------------------------------------------------------------------------------------------------------------------------------------------------------------------------------------------------------------------------------------------------------------------------------------|------------|
| Bioactive compound   | Present in | Chemical structures                                                                                                                                                                                                                                                                                                                                                   | References |
| Curcumin             | -          | 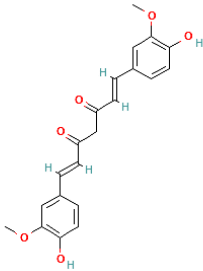 <p>The chemical structure of Curcumin is shown, featuring two 4-hydroxy-3-methoxyphenyl rings connected by a heptadiene chain. The structure is symmetrical, with a central double bond and two terminal double bonds, each substituted with a 4-hydroxy-3-methoxyphenyl group.</p> | [1]        |
| Ellagic acid         | -          |  <p>The chemical structure of Ellagic acid is shown, consisting of two naphthalene-1,8-dicarboxylic acid units linked by two ester bonds. The structure is symmetrical, with two naphthalene rings, each substituted with two carboxylic acid groups and two ester groups.</p>       | [2]        |
| Vitamin C            | Garlic     |  <p>The chemical structure of Vitamin C (Ascorbic acid) is shown, featuring a five-membered lactone ring with two hydroxyl groups on the double bond, and a side chain with two hydroxyl groups and a terminal hydroxymethyl group.</p>                                             | [3,4]      |
| Vitamin E            | -          |  <p>The chemical structure of Vitamin E (Tocopherol) is shown, consisting of a chromanol ring substituted with a hydroxyl group and a long phytyl side chain. The structure is symmetrical, with a chromanol ring and a long phytyl side chain.</p>                               | [5]        |
| Vitamins A           | Garlic     |  <p>The chemical structure of Vitamin A (Retinol) is shown, consisting of a cyclohexene ring substituted with two methyl groups and a side chain with four double bonds and a terminal hydroxyl group.</p>                                                                         | [3,6]      |

|                                          |        |                                                                                     |        |
|------------------------------------------|--------|-------------------------------------------------------------------------------------|--------|
| Saponins<br>(e.g. proto-<br>eruboside-B) | Garlic | 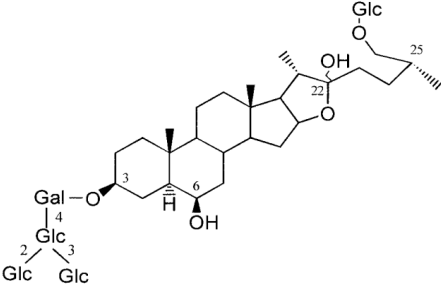  | [3,7]  |
| Gingerdiol                               | Ginger |    | [8,9]  |
| Gingerol                                 | Ginger |   | [8,10] |
| Shogaols                                 | Ginger |  | [8,11] |
| Zingerone                                | Ginger |  | [8,12] |
| Zingibrene                               | Ginger |  | [8,13] |

|                    |                |                                                                                      |                    |
|--------------------|----------------|--------------------------------------------------------------------------------------|--------------------|
| Resveratrol        | Grape          | 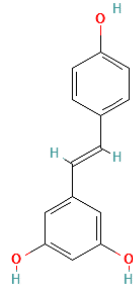    | [14-16]            |
| Pro-anthocyanidins | Grape          |    | [17,18]            |
| Flavonoids         | Grape Propolis |   | [14,15]<br>[19,20] |
| Flavonols          | Green tea      |  | [21,23]            |

#### References:

1. PubChem [Internet]. Bethesda (MD): National Library of Medicine (US), National Center for Biotechnology Information; 2004-. PubChem Compound Summary for CID 969516, Curcumin; Available from: <https://pubchem.ncbi.nlm.nih.gov/compound/Curcumin> [Accessed 9th September 2021].
2. PubChem [Internet]. Bethesda (MD): National Library of Medicine (US), National Center for Biotechnology Information; 2004-. PubChem Compound Summary for CID 5281855, Ellagic acid; Available from: <https://pubchem.ncbi.nlm.nih.gov/compound/Ellagic-acid> [Accessed 9th September 2021].
3. Block, E. The chemistry of garlic and onions, *Sci Am* **1985**,252, 114-119. DOI: 10.1038/scientificamerican0385-114
4. PubChem [Internet]. Bethesda (MD): National Library of Medicine (US), National Center for Biotechnology Information; 2004-. PubChem Compound Summary for CID 5281855, Ellagic acid; Available from: <https://pubchem.ncbi.nlm.nih.gov/compound/Ellagic-acid> [Accessed 9th September 2021].
5. PubChem [Internet]. Bethesda (MD): National Library of Medicine (US), National Center for Biotechnology Information; 2004-. PubChem Compound Summary for CID 14985, Vitamin E; Available from: <https://pubchem.ncbi.nlm.nih.gov/compound/Vitamin-E> [Accessed 9th September 2021].
6. PubChem [Internet]. Bethesda (MD): National Library of Medicine (US), National Center for Biotechnology Information; 2004-. PubChem Compound Summary for CID 445354, Retinol; Available from: <https://pubchem.ncbi.nlm.nih.gov/compound/Retinol> [Accessed 9th September 2021].
7. Matsuura H. Saponins in garlic as modifiers of the risk of cardiovascular disease. *J Nutr.* **2001** Mar;131(3s):1000S-5S. DOI: 10.1093/jn/131.3.1000S

8. Sakr, S., and Badawy, G. Effect of ginger (*Zingiber officinale* R.) on metiram-inhibited spermatogenesis and induced apoptosis in albino mice, *Journal of Applied Pharmaceutical Science* 2011, 01, 131-136
9. PubChem [Internet]. Bethesda (MD): National Library of Medicine (US), National Center for Biotechnology Information; 2004-. PubChem Compound Summary for CID 11369949, Gingerdiol; Available from: <https://pubchem.ncbi.nlm.nih.gov/compound/Gingerdiol> [Accessed 9th September 2021].
10. PubChem [Internet]. Bethesda (MD): National Library of Medicine (US), National Center for Biotechnology Information; 2004-. PubChem Compound Summary for CID 442793, Gingerol; Available from: <https://pubchem.ncbi.nlm.nih.gov/compound/Gingerol> [Accessed 9th September 2021].
11. PubChem [Internet]. Bethesda (MD): National Library of Medicine (US), National Center for Biotechnology Information; 2004-. PubChem Compound Summary for CID 5281794, Shogaol; Available from: <https://pubchem.ncbi.nlm.nih.gov/compound/Shogaol> [Accessed 9th September 2021].
12. PubChem [Internet]. Bethesda (MD): National Library of Medicine (US), National Center for Biotechnology Information; 2004-. PubChem Compound Summary for CID 31211, Zingerone; Available from: <https://pubchem.ncbi.nlm.nih.gov/compound/Zingerone> [Accessed 9th September 2021].
13. PubChem [Internet]. Bethesda (MD): National Library of Medicine (US), National Center for Biotechnology Information; 2004-. PubChem Compound Summary for CID 92776, Zingiberene; Available from: <https://pubchem.ncbi.nlm.nih.gov/compound/Zingiberene> [Accessed 9th September 2021].
14. El-Ashmawy, I. M., Saleh, A., and Salama, O. M. Effects of marjoram volatile oil and grape seed extract on ethanol toxicity in male rats, *Basic & Clinical Pharmacology & Toxicology* **2007**, 101, 320-327. DOI: 10.1111/j.1742-7835.2007.00125.x
15. Lamas, C. A., Cuquetto-Leite, L., do Nascimento da Silva, E., Thomazini, B. F., Cordeiro, G. D. S., Predes, F. S., Gollücke, A. P. B., and Dolder, H. Grape juice concentrate alleviates epididymis and sperm damage in cadmium-intoxicated rats, *Int J Exp Pathol* **2017**, 98, 86-99. DOI: 10.1111/iep.12227
16. PubChem [Internet]. Bethesda (MD): National Library of Medicine (US), National Center for Biotechnology Information; 2004-. PubChem Compound Summary for CID 445154, Resveratrol; Available from: <https://pubchem.ncbi.nlm.nih.gov/compound/Resveratrol> [Accessed 9th September 2021].
17. Maffei Facino, R., Carini, M., Aldini, G., Bombardelli, E., Morazzoni, P., and Morelli, R. Free radicals scavenging action and anti-enzyme activities of procyanidines from *Vitis vinifera*. A mechanism for their capillary protective action, *Arzneimittel-Forschung* **1994**, 44, 592-601.
18. PubChem [Internet]. Bethesda (MD): National Library of Medicine (US), National Center for Biotechnology Information; 2004-. PubChem Compound Summary for CID 108065, Proanthocyanidin; Available from: <https://pubchem.ncbi.nlm.nih.gov/compound/Proanthocyanidin> [Accessed 9th September 2021].
19. Yousef, M. I., and Salama, A. F. Propolis protection from reproductive toxicity caused by aluminium chloride in male rats, *Food Chem Toxicol* **2009**, 47, 1168-1175. DOI: 10.1016/j.fct.2009.02.006
20. Selamoglu Talas, Z. Propolis reduces oxidative stress in l-NAME-induced hypertension rats, *Cell Biochem Funct* **2014**, 32, 150-154. DOI: 10.1002/cbf.2986
21. Ullah A, Munir S, Badshah SL, Khan N, Ghani L, Poulson BG, Emwas AH, Jaremko M. Important Flavonoids and Their Role as a Therapeutic Agent, *Agent. Molecules* **2020**, 25(22), 5243. DOI: 10.3390/molecules25225243
22. Chacko, S. M., Thambi, P. T., Kuttan, R., and Nishigaki, I. Beneficial effects of green tea: a literature review, *Chinese Medicine* **2010**, 5, 13-13. DOI: 10.1186/1749-8546-5-13
23. Graham, H. N. Green tea composition, consumption, and polyphenol chemistry, *Prev Med* **1992**, 21, 334-350. DOI: 10.1016/0091-7435(92)90041-F
